# Supplementary material for: Label-free biodetection using a smartphone
Source: Royal Society of Chemistry journal article supplement (doi:10.1039/c3lc40991k), 2013-01-01
Supplement: c3lc40991k.pdf [file c3lc40991k.pdf]

## Supplementary Information

### Label-Free Biodetection using a Smartphone

Dustin Gallegos<sup>1+</sup>, Kenneth Long<sup>2+</sup>, Hojeong Yu<sup>1+</sup>, Peter Clark<sup>3</sup>, Yixiao Lin<sup>1</sup>,  
Sherine George<sup>2</sup>, Pabitra Nath<sup>1</sup>, and Brian T. Cunningham<sup>1,2\*</sup>

<sup>1</sup>Department of Electrical and Computer Engineering

<sup>2</sup>Department of Bioengineering

University of Illinois at Urbana Champaign, 208 North Wright Street, Urbana IL 61801, USA

<sup>3</sup>Lensvector, Inc 6 Clock Tower Place. Maynard, MA 01754

<sup>+</sup> Co-authors who contributed equally to this work, listed alphabetically

\*E-mail: [bcunning@illinois.edu](mailto:bcunning@illinois.edu)

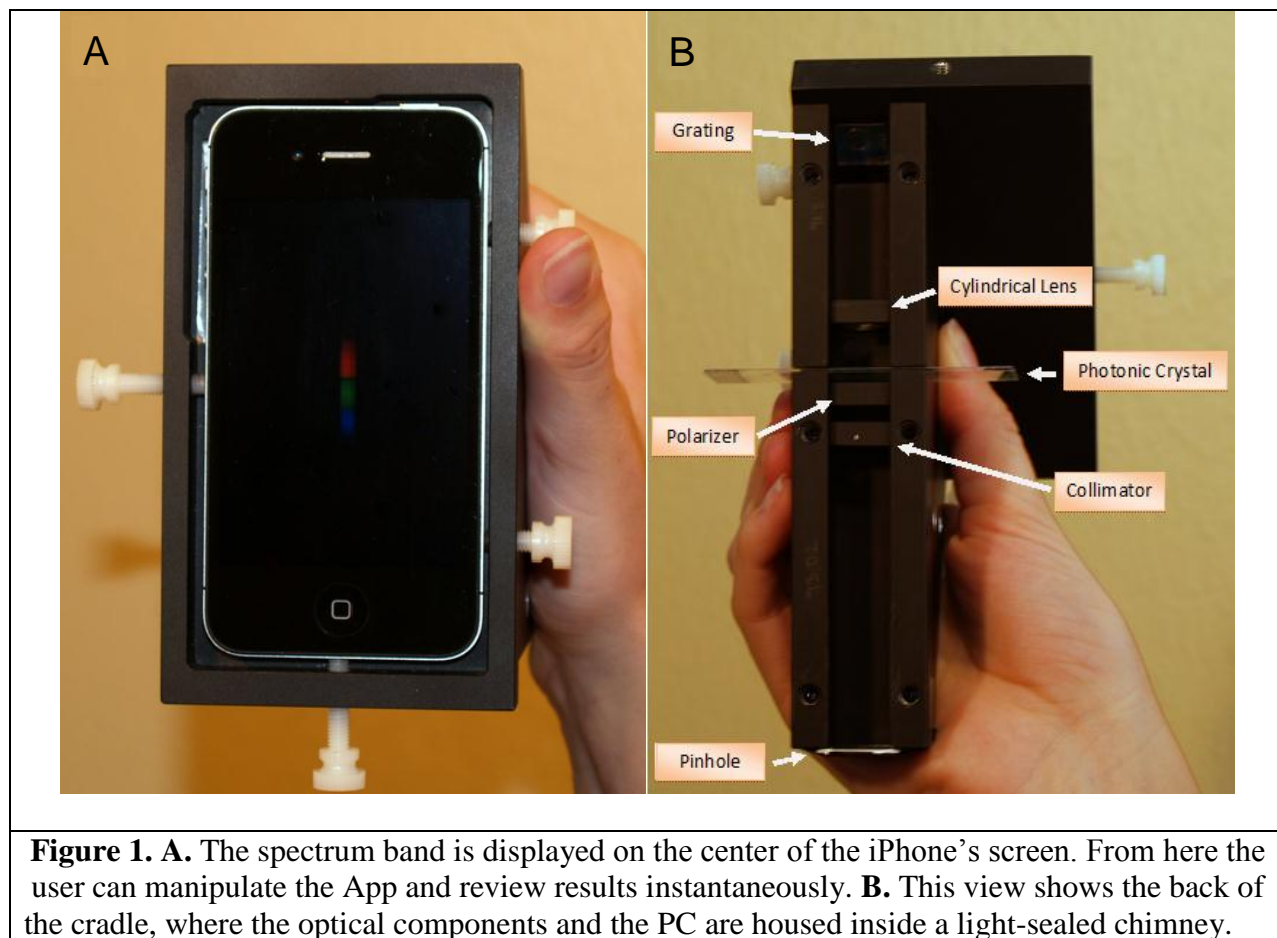

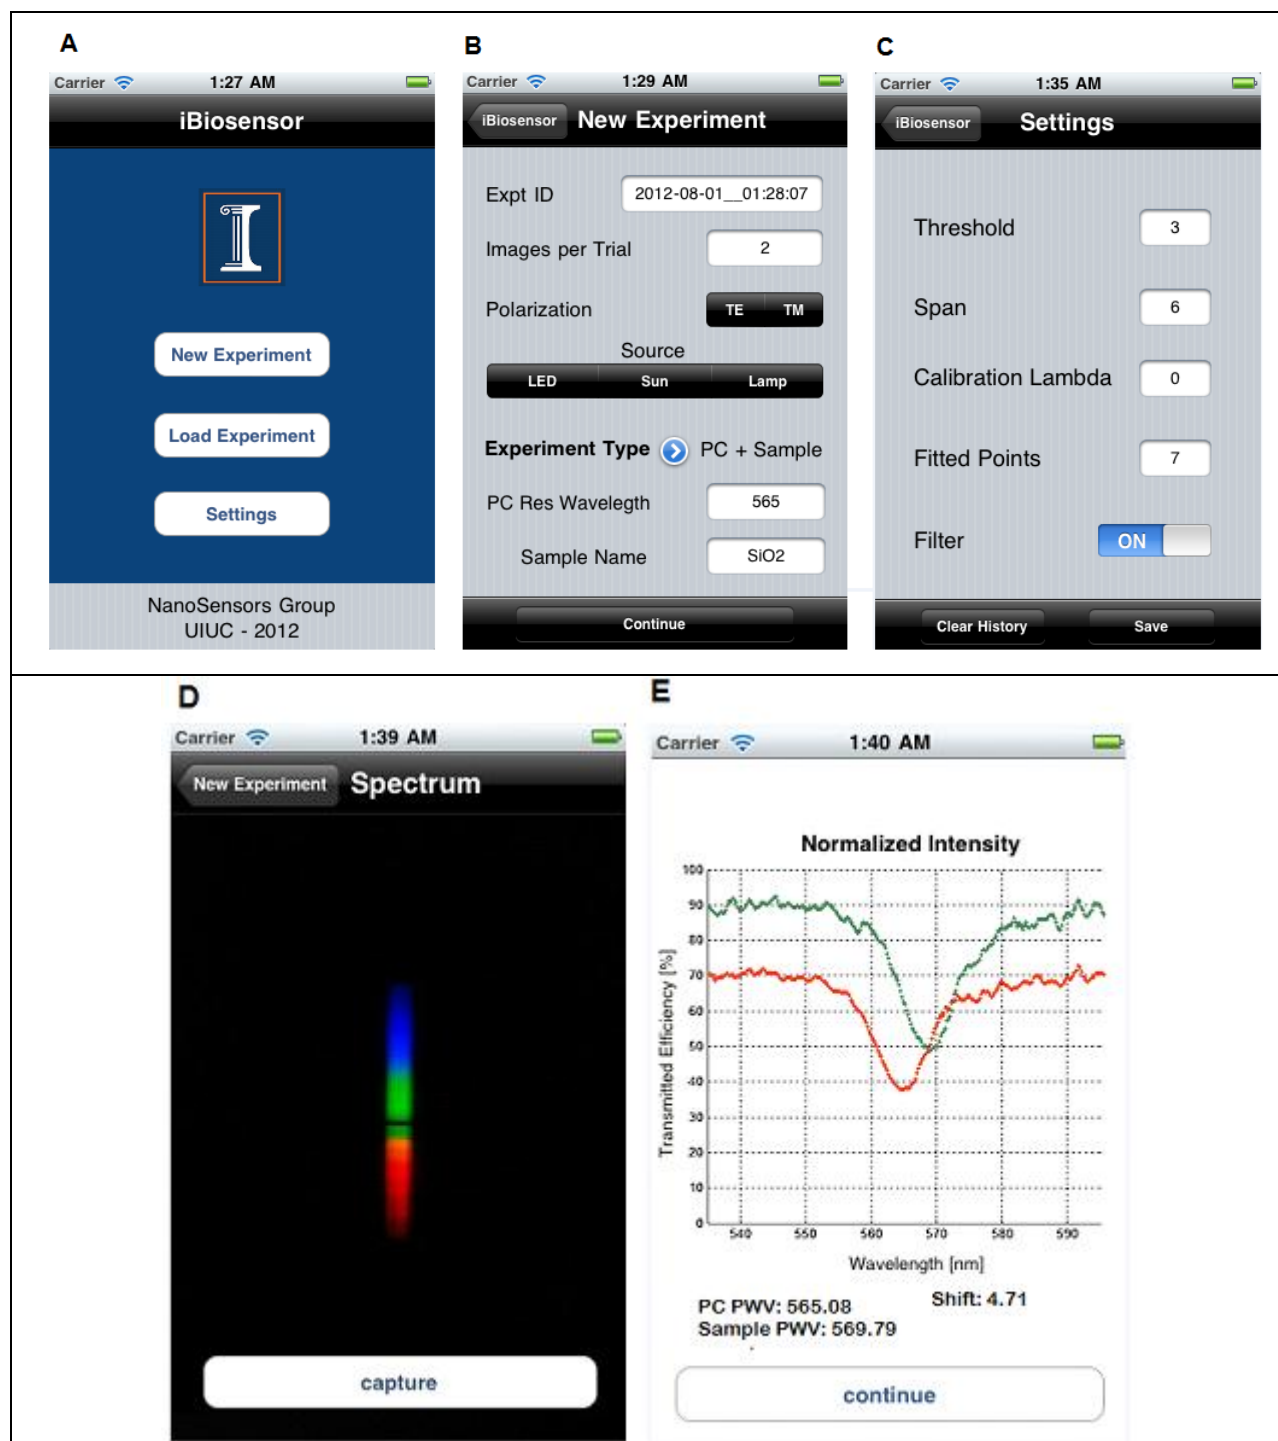

**Figure 2.** **A.** Home screen view of the custom App. **B.** Screen view from which the App collects information about the experiment. **C.** The user can also change general parameters within the settings view. **D.** The spectrum band as seen by the App. **E.** The App plots intensity profile of both, the reference PC (Red) and a sample (Green) and outputs the resulting PWV shift between the two as shown.

**Table 1: List of optical components and their cost**

| <b>Component/ part list</b>                                              | <b>Cost (USD)</b> |
|--------------------------------------------------------------------------|-------------------|
| 1. 100 micron pinhole NT36-392                                           | \$39.00           |
| 2. 75 mm FL pl-cx lens NT63-491                                          | \$27.50           |
| 3. Linear plastic polarizer NT85-354                                     | \$25.00           |
| 4. 50mm FL Cylindrical lens NT48-354                                     | \$47.00           |
| 5. 1200 grooves transmission grating GT13-12                             | \$71.40           |
| Item #1-4 were purchased from Edmund Optics, while #5 from Thorlabs Inc. |                   |
